# Supplementary material
Source: HighWire-hosted journal article supplement (https://bmjopen.bmj.com/content/10/9/e035794)

Supplementary Fig 2. SLATE II algorithm to support same-day HIV treatment initiation [8]

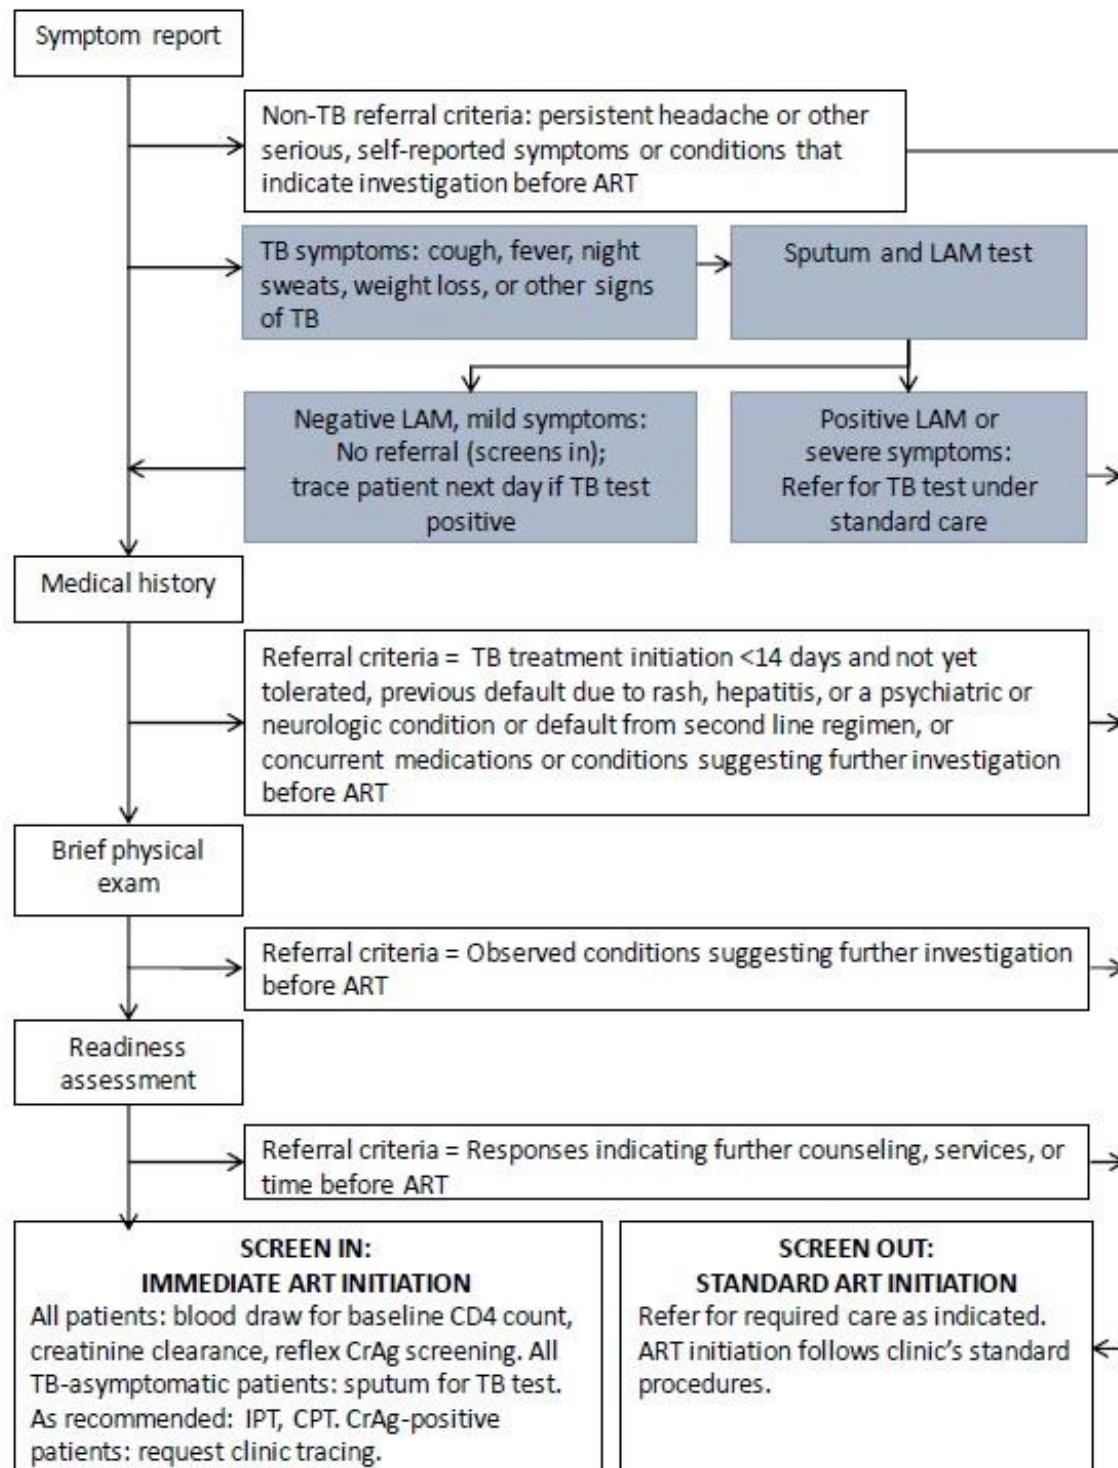

Supplement: inline-supplementary-material-2 [file inline-supplementary-material-2.pdf]
