# Supplementary material
Source: HighWire-hosted journal article supplement (https://bmjopen.bmj.com/content/10/9/e035794)
Supplement: inline-supplementary-material-3 [file inline-supplementary-material-3.pdf]

**Supplementary Table 1. Characteristics of patients at enrollment in Kenya and South Africa SLATE I and SLATE II trials**

| Variables†                                                       | Categories                      | Intervention arm                 | Intervention arm                       | Intervention arm                        |
|------------------------------------------------------------------|---------------------------------|----------------------------------|----------------------------------------|-----------------------------------------|
|                                                                  |                                 | Kenya (SLATE I)<br>(N = 240)     | South Africa<br>(SLATE I)<br>(N = 298) | South Africa<br>(SLATE II)<br>(N = 296) |
|                                                                  |                                 | n (%)                            | n (%)                                  | n (%)                                   |
| Period of enrollment                                             |                                 | July 13, 2017-<br>April 27, 2018 | March 6, 2017-<br>July 28, 2017        | March 14-<br>Sept 18, 2018              |
| Sex                                                              | Female                          | 142 (59)                         | 189 (63)                               | 189 (64)                                |
| Age                                                              | Median (IQR)                    | 36 (29, 44)                      | 34 (29, 41)                            | 35 (29, 41)                             |
| CD4 count at enrollment<br>(cells/mm <sup>3</sup> )              | Median (IQR)                    | 272 (124, 522)                   | 275 (132, 459)                         | 294 (135, 464)                          |
| Location of current<br>residence                                 | Town (urban)                    | 35 (15)                          | 18 (6)                                 | 31 (10)                                 |
|                                                                  | Peri-urban                      | 66 (28)                          | 299 (89)                               | 265 (90)                                |
|                                                                  | Rural home or village           | 139 (58)                         | 14 (5)                                 | 0 (0)                                   |
| Current house is primary<br>residence                            | Yes                             | 154 (64)                         | 141 (47)                               | 128 (43)                                |
| Number other persons in<br>house                                 | Median (IQR)                    | 3 (2, 5)                         | 2 (1, 3)                               | 1 (1, 3)                                |
| Usual activity when well                                         | Formal employment               | 18 (8)                           | 82 (28)                                | 69 (23)                                 |
|                                                                  | Informal sector work            | 161 (67)                         | 80 (27)                                | 70 (24)                                 |
|                                                                  | Unemployed, looking<br>for work | 12 (5)                           | 107 (36)                               | 138 (47)                                |
|                                                                  | Other                           | 9 (4)                            | 29 (10)                                | 12 (4)                                  |
| Transport mode to clinic<br>today (multiple choices<br>possible) | Minibus or taxi                 | 118 (49)                         | 122 (41)                               | 110 (37)                                |
|                                                                  | Walking                         | 46 (19)                          | 156 (53)                               | 161 (54)                                |
|                                                                  | Private car                     | 11 (5)                           | 19 (19)                                | 25 (8)                                  |
|                                                                  | Motorbike                       | 137 (57)                         | 0 (0)                                  | 0 (0)                                   |
