# Supplementary material
Source: HighWire-hosted journal article supplement (https://bmjopen.bmj.com/content/10/9/e035794)
Supplement: inline-supplementary-material-4 [file inline-supplementary-material-4.pdf]

**Supplementary Table 2. Median CD4 count (cells/mm<sup>3</sup>) for patients with and without TB symptoms and those with TB diagnosis in SLATE I and SLATE II trials**

| Variable                                                     | Median CD4 Count<br>Intervention arm<br>Kenya (SLATE I) |               | Median CD4 Count<br>Intervention arm<br>South Africa (SLATE I) |               | Median CD4 Count<br>Intervention arm<br>South Africa (SLATE II) |               |
|--------------------------------------------------------------|---------------------------------------------------------|---------------|----------------------------------------------------------------|---------------|-----------------------------------------------------------------|---------------|
|                                                              | n (%)                                                   | Median (IQR)  | n (%)                                                          | Median (IQR)  | n (%)                                                           | Median (IQR)  |
| <b>No TB symptoms</b>                                        | 148 (62)                                                | 357 (191-632) | 191 (63)                                                       | 307 (141-486) | 156 (53)                                                        | 405 (210-547) |
| <b>TB symptom positive</b>                                   | 90 (38)                                                 | 152 (64-329)  | 105 (37)                                                       | 245 (125-425) | 140 (47)                                                        | 175 (89-365)  |
| <b>TB symptom presence</b>                                   |                                                         |               |                                                                |               |                                                                 |               |
| Cough (current)                                              | 75 (83)                                                 | 144 (58-319)  | 71 (68)                                                        | 274 (132-433) | 76 (54)                                                         | 157 (68-416)  |
| Fever                                                        | 53 (59)                                                 | 136 (49-316)  | 45 (43)                                                        | 230 (78-368)  | 20 (14)                                                         | 110 (73-203)  |
| Night sweats                                                 | 56 (62)                                                 | 215 (56-388)  | 44 (42)                                                        | 229 (176-368) | 29 (21)                                                         | 135 (101-367) |
| Weight loss                                                  | 72 (80)                                                 | 146 (53-319)  | 76 (72)                                                        | 251 (133-433) | 96 (69)                                                         | 157 (68-337)  |
| <b>TB symptoms</b>                                           |                                                         |               |                                                                |               |                                                                 |               |
| 1 symptom                                                    | 13 (14)                                                 | 207 (147-317) | 36 (34)                                                        | 188 (72-295)  | 89 (64)                                                         | 250 (98-369)  |
| 2 symptoms                                                   | 18 (20)                                                 | 95 (64-232)   | 27 (26)                                                        | 373 (227-520) | 32 (23)                                                         | 137 (76-342)  |
| 3 symptoms                                                   | 29 (32)                                                 | 232 (72-406)  | 22 (21)                                                        | 216 (76-368)  | 8 (6)                                                           | 165 (63-350)  |
| 4 symptoms                                                   | 30 (33)                                                 | 116 (24-277)  | 20 (19)                                                        | 267 (180-423) | 11 (8)                                                          | 106 (68-157)  |
| <b>Symptom prevalence<br/>in those diagnosed<br/>with TB</b> |                                                         | <b>n=12</b>   |                                                                | <b>n=9</b>    |                                                                 | <b>n=7</b>    |
| Cough (current)                                              | 12 (100)                                                | 124 (12-150)  | 9 (100)                                                        | 251 (47-288)  | 6 (86)                                                          | 92 (60-107)   |
| Fever                                                        | 9 (75)                                                  | 114 (12-150)  | 7 (78)                                                         | 201 (18-339)  | 4 (57)                                                          | 92 (69-107)   |
| Night sweats                                                 | 12 (100)                                                | 142 (55-224)  | 7 (78)                                                         | 201 (18-288)  | 4 (57)                                                          | 69 (40-92)    |
| Weight loss                                                  | 10 (83)                                                 | 124 (12-150)  | 9 (100)                                                        | 251 (47-288)  | 5 (71)                                                          | 78 (60-106)   |
